# Supplementary material for: Genomic modules and intramodular network concordance in susceptible and resilient male mice across models of stress
Source: PubMed Central journal article supplement (PMC8938529; doi:10.1038/s41386-021-01219-8), 2021-11-30
Supplement: 41386_2021_1219_MOESM2_ESM.pdf [file 41386_2021_1219_MOESM2_ESM.pdf]

**Supplementary Table 1. Body weight over the course of CORT treatment.**

|      | WT           |              | BDNF het-Met |              |
|------|--------------|--------------|--------------|--------------|
| Week | Vehicle      | CORT         | Vehicle      | CORT         |
| 0    | 26.55 ± 0.31 | 25.05 ± 0.33 | 26.31 ± 0.49 | 26.92 ± 0.49 |
| 1    | 27.65 ± 0.31 | 26.19 ± 0.44 | 27.74 ± 0.54 | 27.67 ± 0.64 |
| 2    | 28.5 ± 0.38  | 27.85 ± 0.47 | 28.49 ± 0.54 | 28.77 ± 0.84 |
| 3    | 29.19 ± 0.42 | 29.75 ± 0.46 | 29.38 ± 0.47 | 29.39 ± 1.05 |
| 4    | 29.65 ± 0.45 | 30.84 ± 0.53 | 29.86 ± 0.50 | 30.06 ± 1.14 |
| 5    | 30.13 ± 0.52 | 32.09 ± 0.55 | 30.28 ± 0.54 | 31.1 ± 1.18  |
| 6    | 30.86 ± 0.50 | 32.43 ± 0.53 | 30.82 ± 0.55 | 32.12 ± 1.29 |

**Supplementary Table 2. GO with related genes from RRHO analysis.**

| <b>GO Term</b>           | <b>Enrichment Score</b> | <b># Genes</b> | <b>Select Genes</b>                                                          |
|--------------------------|-------------------------|----------------|------------------------------------------------------------------------------|
| <b>Pink Module</b>       |                         |                |                                                                              |
| Immunity                 | 16.21                   | 73             | Fos, Ncf1, Ncf4, ligp1, Tlr2, Tlr6, Casp8, Fcgr1, Nfkbia, H2-Aa              |
| Extracellular Matrix     | 10.90                   | 53             | Cdh1, Cadm4, Itga1, Itgb2, Itgb3, Itgb4, Tgfb1, Des, Nectin2, Col2a1         |
| Wnt/PI3K Signaling       | 9.70                    | 90             | Wnt3, Wnt9a, Met, Hgf, Fgfr2, Tdgf1, Fgf18, Jak3, Tek, Comp                  |
| Signal Transduction      | 5.11                    | 159            | Grb7, Gab1, Igfbp2, Ghssr, Fyb, Hhip, Npbwr1, Pkig, Ntsr1, Oprk1             |
| Iron Homeostasis         | 2.65                    | 11             | Trf, Lcn2, Mfi2, Bdh2, Scara5, Steap1, Steap3, Steap4                        |
| <b>Green Module</b>      |                         |                |                                                                              |
| Neurotransmission        | 11.98                   | 64             | Cacna1b, Trpm2, Slc9a5, Cacna1g, Slc38a4, Clic6, Slc9a2, Scn5a, Kcnmb2, Casr |
| Neuronal Differentiation | 3.88                    | 18             | Shh, Otx2, Notch1, Sox5, Ar, Kdr, Insm1, Kdm6b                               |
| Social Behavior          | 2.53                    | 6              | Tbx1, Nrnx2, Nrnx3, Shank1, Shank2, Cntnap2                                  |
| Vascular System          | 2.52                    | 7              | Cav3, Myh7, Hcn4, Casq2                                                      |
| Phosphorylation          | 1.46                    | 68             | Myo1a, Myo5b, Smarca4, Tubd1, Mast1, Mast3, Mast4, Met, Dnm3, Fuk            |

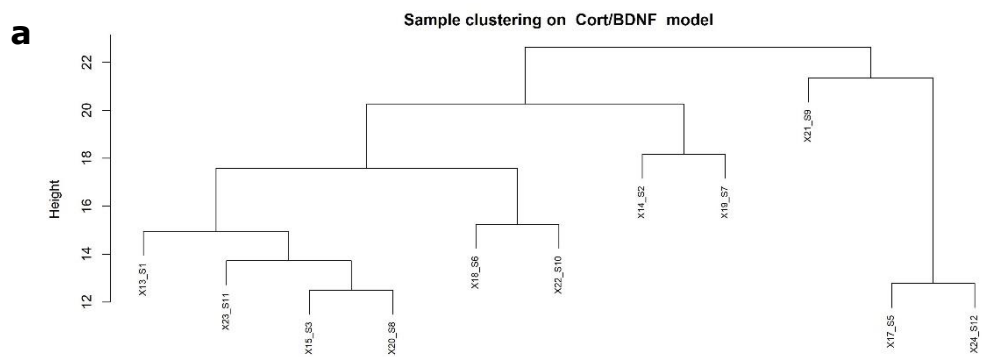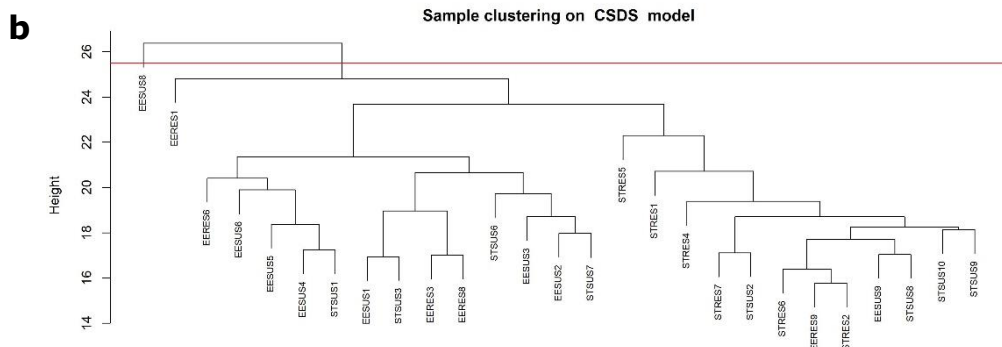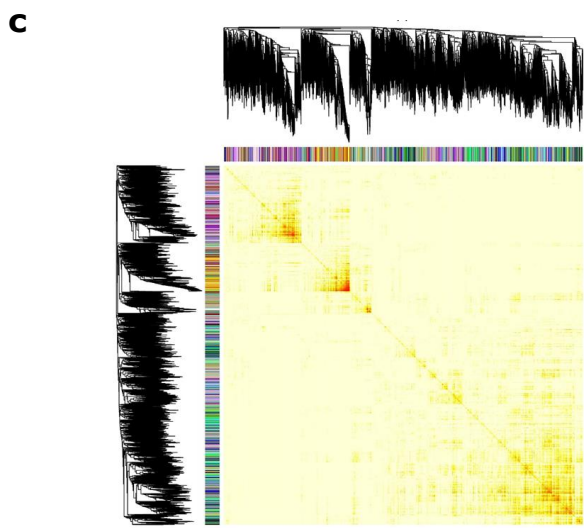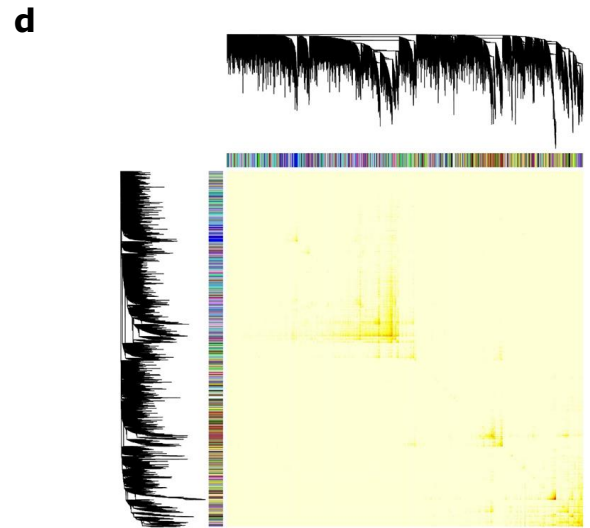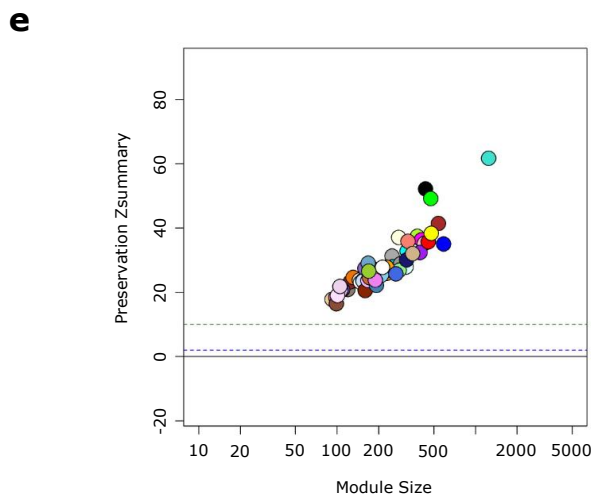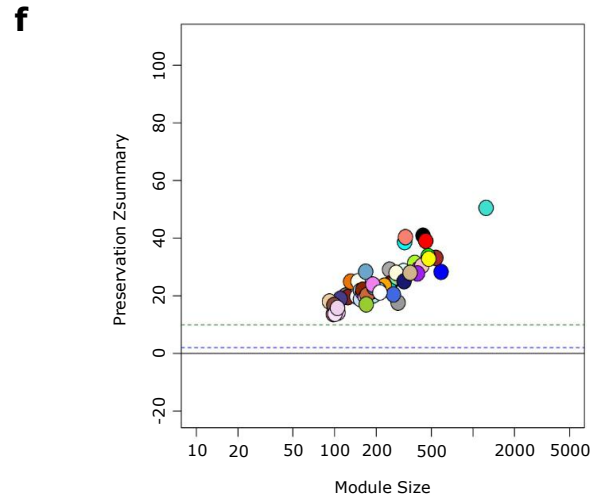

Supplementary Fig. 1

**Supplementary Table 3. Differentially expressed genes in the *cyan* and *yellow* modules.**

**a**

| Gene Symbol | p-value | log(Fold Change) |
|-------------|---------|------------------|
| Spink8      | 0.0018  | 0.5845           |
| Agt         | 0.003   | 0.6115           |
| Sparc       | 0.0051  | 0.409            |
| Krt73       | 0.0083  | 0.4937           |
| Alox12b     | 0.012   | 0.4433           |
| Plekhs1     | 0.0458  | 0.9487           |

**b**

| Gene Symbol | p-value | log(Fold Change) |
|-------------|---------|------------------|
| Spink8      | 0.0002  | 0.7385           |
| Alg1        | 0.0009  | 0.3935           |
| Sema3e      | 0.0068  | 0.3917           |
| Sult5a1     | 0.0077  | 0.8232           |
| Krt73       | 0.008   | 0.4433           |
| Adamts14    | 0.0102  | 0.7618           |
| Tph1        | 0.0118  | 1.3558           |
| Zap70       | 0.0122  | 0.5518           |
| Shisa2      | 0.0226  | 0.3845           |
| Gpr139      | 0.0242  | 0.4918           |
| Slc9a4      | 0.0304  | 0.384            |
| Nhlh2       | 0.0347  | 0.4328           |
| Stab2       | 0.0424  | 0.5176           |

**c**

| Gene Symbol | p-value | log(Fold Change) |
|-------------|---------|------------------|
| Adamts14    | 0.003   | 0.7126           |
| Cpne7       | 0.0038  | 0.578            |
| Alox12b     | 0.0192  | 0.4491           |
| Galr2       | 0.0322  | 0.4196           |
| Gla1        | 0.0409  | 1.133            |

**d**

| Gene Symbol | p-value | log(Full Change) |
|-------------|---------|------------------|
| Chn2        | 0.0011  | 0.6057           |
| Ncf4        | 0.0022  | 0.885            |
| Rassf3      | 0.0031  | 0.4949           |
| Atp8b1      | 0.0038  | 0.7065           |
| Grrp1       | 0.0046  | 0.675            |
| Ptprc       | 0.0052  | 0.8455           |
| Rasgef1b    | 0.0054  | 0.7237           |
| Tlr13       | 0.0066  | 0.5613           |
| Gpr153      | 0.0068  | 0.5296           |
| Adra1b      | 0.0098  | 0.5363           |
| Usp43       | 0.0147  | 0.7191           |
| Tnnt1       | 0.0167  | 0.8051           |
| Slc5a7      | 0.0171  | 1.208            |
| Fcgr1       | 0.0211  | 0.6961           |
| Krt12       | 0.0259  | 1.1629           |
| Rel1        | 0.026   | 0.4882           |
| Medag       | 0.0266  | 0.5227           |
| Dysf        | 0.0294  | 0.4276           |
| Fign        | 0.0295  | 0.5983           |
| Ntsr1       | 0.0304  | 0.539            |
| Hs3st5      | 0.0329  | 0.6115           |
| Plekhf1     | 0.033   | 0.4659           |
| Stil        | 0.034   | 0.7658           |
| Cux2        | 0.0369  | 0.4095           |
| Cobl        | 0.0392  | 0.5536           |
| Gimap6      | 0.0408  | 0.3867           |
| Sox7        | 0.0426  | 0.4704           |

**e**

| Gene Symbol | p-value | log(Fold Change) |
|-------------|---------|------------------|
| Socs3       | 0.0049  | 0.5483           |
| Kazald1     | 0.0049  | 0.3833           |
| Ackr1       | 0.0122  | 0.4818           |
| Epha8       | 0.0198  | 0.5484           |
| Rgs16       | 0.0254  | 0.6734           |
| Foxp2       | 0.029   | 0.9195           |
| Chrna6      | 0.0404  | 1.3463           |
| Usp43       | 0.0412  | 0.7404           |
| Rora        | 0.0453  | 0.4583           |
| Plcb4       | 0.0467  | 0.4355           |
| Endou       | 0.0497  | 0.6653           |

**Supplementary Table 4. Common differentially expressed genes in preclinical models of stress-related disorders and humans with major depressive disorder.**

| Genes           | [1]  |     | [2] |     |     | [3] |      |       |       | [4] |      |     |
|-----------------|------|-----|-----|-----|-----|-----|------|-------|-------|-----|------|-----|
|                 | vHPC | HPC | AMY | BLA | PFC | NAc | aINS | vmPFC | dIPFC | NAc | vSUB | PFC |
| <i>Sult5a1</i>  |      |     |     |     |     |     |      |       |       |     |      |     |
| <i>Zap70</i>    |      |     |     |     |     |     |      |       |       |     |      |     |
| <i>Sema3e</i>   |      |     |     |     |     |     |      |       |       |     |      |     |
| <i>Chst8</i>    |      |     |     |     |     |     |      |       |       |     |      |     |
| <i>Cpne7</i>    |      |     |     |     |     |     |      |       |       |     |      |     |
| <i>Dock9</i>    |      |     |     |     |     |     |      |       |       |     |      |     |
| <i>Gnptab</i>   |      |     |     |     |     |     |      |       |       |     |      |     |
| <i>Sorcs3</i>   |      |     |     |     |     |     |      |       |       |     |      |     |
| <i>Zdbf2</i>    |      |     |     |     |     |     |      |       |       |     |      |     |
| <i>Abca2</i>    |      |     |     |     |     |     |      |       |       |     |      |     |
| <i>Sparc</i>    |      |     |     |     |     |     |      |       |       |     |      |     |
| <i>Kndc1</i>    |      |     |     |     |     |     |      |       |       |     |      |     |
| <i>Akap13</i>   |      |     |     |     |     |     |      |       |       |     |      |     |
| <i>Fcgr1</i>    |      |     |     |     |     |     |      |       |       |     |      |     |
| <i>Gpr88</i>    |      |     |     |     |     |     |      |       |       |     |      |     |
| <i>Rorb</i>     |      |     |     |     |     |     |      |       |       |     |      |     |
| <i>Sox7</i>     |      |     |     |     |     |     |      |       |       |     |      |     |
| <i>Rasgrp2</i>  |      |     |     |     |     |     |      |       |       |     |      |     |
| <i>Prkch</i>    |      |     |     |     |     |     |      |       |       |     |      |     |
| <i>Hs3st5</i>   |      |     |     |     |     |     |      |       |       |     |      |     |
| <i>Tnnt1</i>    |      |     |     |     |     |     |      |       |       |     |      |     |
| <i>Rel1</i>     |      |     |     |     |     |     |      |       |       |     |      |     |
| <i>Plekhf1</i>  |      |     |     |     |     |     |      |       |       |     |      |     |
| <i>Cux2</i>     |      |     |     |     |     |     |      |       |       |     |      |     |
| <i>Rims3</i>    |      |     |     |     |     |     |      |       |       |     |      |     |
| <i>Chrna4</i>   |      |     |     |     |     |     |      |       |       |     |      |     |
| <i>Usp43</i>    |      |     |     |     |     |     |      |       |       |     |      |     |
| <i>Tmsb10</i>   |      |     |     |     |     |     |      |       |       |     |      |     |
| <i>Meis1</i>    |      |     |     |     |     |     |      |       |       |     |      |     |
| <i>Kazald1</i>  |      |     |     |     |     |     |      |       |       |     |      |     |
| <i>Nudt4</i>    |      |     |     |     |     |     |      |       |       |     |      |     |
| <i>Sowahb</i>   |      |     |     |     |     |     |      |       |       |     |      |     |
| <i>Cd34</i>     |      |     |     |     |     |     |      |       |       |     |      |     |
| <i>Trpc3</i>    |      |     |     |     |     |     |      |       |       |     |      |     |
| <i>Cdh7</i>     |      |     |     |     |     |     |      |       |       |     |      |     |
| <i>Epha8</i>    |      |     |     |     |     |     |      |       |       |     |      |     |
| <i>H2-Q7</i>    |      |     |     |     |     |     |      |       |       |     |      |     |
| <i>Socs3</i>    |      |     |     |     |     |     |      |       |       |     |      |     |
| <i>Ankrd34c</i> |      |     |     |     |     |     |      |       |       |     |      |     |
| <i>Krt12</i>    |      |     |     |     |     |     |      |       |       |     |      |     |
| <i>Zdhhc22</i>  |      |     |     |     |     |     |      |       |       |     |      |     |
| <i>Cobl</i>     |      |     |     |     |     |     |      |       |       |     |      |     |
| <i>Grm4</i>     |      |     |     |     |     |     |      |       |       |     |      |     |
| <i>Fhod3</i>    |      |     |     |     |     |     |      |       |       |     |      |     |
| <i>Figf</i>     |      |     |     |     |     |     |      |       |       |     |      |     |
| <i>Hivep1</i>   |      |     |     |     |     |     |      |       |       |     |      |     |
| <i>Plcb4</i>    |      |     |     |     |     |     |      |       |       |     |      |     |
| <i>Foxp2</i>    |      |     |     |     |     |     |      |       |       |     |      |     |
| <i>Atp8b1</i>   |      |     |     |     |     |     |      |       |       |     |      |     |
| <i>Deptor</i>   |      |     |     |     |     |     |      |       |       |     |      |     |

[1] Bagot RC, Cates HM, Purushothaman I, Vialou V, Heller EA, Yieh L, et al. Ketamine and Imipramine Reverse Transcriptional Signatures of Susceptibility and Induce Resilience-Specific Gene Expression Profiles. *Biol Psychiatry*. 2017;81(4):285-95.

[2] Paden W, Barko K, Puralewski R, Cahill KM, Huo Z, Shelton MA, et al. Sex differences in adult mood and in stress-induced transcriptional coherence across mesocorticolimbic circuitry. *Transl Psychiatry*. 2020;10(1):59.

[3] Labonté B, Engmann O, Purushothaman I, Menard C, Wang J, Tan C, et al. Sex-specific transcriptional signatures in human depression. *Nat Med*. 2017;23(9):1102-11.

[4] Deonaraine KK, Wang Q, Cheng H, Chan KL, Lin H-Y, Liu K, et al. Sex-specific peripheral and central responses to stress-induced depression and treatment in a mouse model. *Journal of Neuroscience Research*. 2020;98(12):2541-53.

## SUPPLEMENTARY LEGENDS

**Supplementary Table 1. Body weight over the course of CORT treatment.** Body weight was measured one a week during the 6-week treatment. CORT-treated mice showed no difference compared to vehicle-treated mice.

**Supplementary Table 2. GO with related genes from RRHO analysis.** GO analysis was performed in RRHO quadrants that shared genes with similar biological functions. Quadrants with similar biological networks were aggregated into a “pink” module and a “green” module, as indicated in Figure 2. Columns represent the (i) gene ontology term, (ii) enrichment score and (iii) total number of genes obtained from DAVID annotation clustering; (iv) genes selected based on their known role in neuronal function.

**Supplementary Figure 1. Validation of Consensus Coexpression Network.** Hierarchical clustering analysis for a) the CORT model and b) the chronic social defeat stress (CSDS) model. Modules with high mutual similarity of greater than 85% were merged. Topological overlap matrix (TOM) of WGCNA modules for c) the CORT model and d) the CSDS model. Increasing color intensity from white to dark red within the TOM indicates increasing coexpression-based topological overlap. Preservation Z-summary of network modules as compared to their size in genes for e) the CORT model and f) the CSDS model. Modules with preservation Z-scores greater than 10 (above the dotted green line) and not less than 2 (below the dotted blue line) were indicated to be strongly preserved in the data set.

**Supplementary Table 3. Differentially expressed genes in the *cyan* and *yellow* modules.** The tables depicts differentially expressed hub genes of the *cyan* (a-c) and *yellow* (d,e) module in a) WT mice under CORT, b) BDNF het-Met mice under CORT, c) SUS mic in SH, d) BDNF het-Met mice under vehicle, and e) SUS mice in EE. Rows are highlighted in cyan or yellow to indicate gene hubs that are shared across groups.

**Supplementary Table 4. Common differentially expressed genes in preclinical models of stress-related disorders and humans with major depressive disorder.** The table depicts shared differentially expressed genes between the gene hubs of the *yellow* or *cyan* module and datasets from models that use different stressors or humans with major depressive disorder that investigate genomic signatures of stress coping in multiple brain regions. Cells are highlighted in either yellow or cyan depending on the module that overlaps with the gene of interest.
